# Supplementary material
Source: PubMed Central journal article supplement (PMC4528531)
Supplement: rspb20151198supp1.pdf [file rspb20151198supp1.pdf]

### Data for wing size and excised wing voltage threshold

| Length |        | Width |        | Excised wing |
|--------|--------|-------|--------|--------------|
| Male   | Female | Male  | Female | Male         |
| 1.37   | 1.63   | 0.93  | 1.07   | 0.8          |
| 1.43   | 1.42   | 1     | 0.95   | 0.7          |
| 1.3    | 1.4    | 0.87  | 0.92   | 0.6          |
| 1.37   | 1.51   | 0.94  | 1.01   | 0.8          |
| 1.11   | 1.34   | 0.78  | 0.9    | 0.5          |
| 1.21   | 1.5    | 0.83  | 0.98   | 0.9          |
| 1.33   | 1.5    | 0.92  | 0.99   | 0.5          |
| 1.23   | 1.62   | 0.86  | 1.08   | 0.7          |

### Data for Figure 2, avoidance response indices

| male        |        |        | 5 min    | female   |        |
|-------------|--------|--------|----------|----------|--------|
| 0.0kV       | 0.0kV  | 0.0kV  |          | 0.0kV    | 0.0kV  |
| Uncharge    | Charge | Charge | RI value | Uncharge | Charge |
| 7           | 8      | 8      | -0.07    | 7        | 7      |
| 8           | 7      | 7      | 0.07     | 6        | 4      |
| 11          | 4      | 4      | 0.47     | 5        | 5      |
| 5           | 12     | 12     | -0.41    | 8        | 7      |
| 3           | 5      | 5      | -0.25    | 4        | 7      |
| 9           | 2      | 2      | 0.64     | 3        | 11     |
| <b>Mean</b> |        |        | 0.07     |          |        |
| <b>SEM</b>  |        |        | 0.17     |          |        |
| male        |        |        | 5 min    | female   |        |
| 0.37kV      | 0.37kV | 0.37kV |          | 0.37kV   | 0.37kV |
| Uncharge    | Charge | Charge |          | Uncharge | Charge |
| 11          | 4      | 4      | 0.47     | 11       | 5      |
| 7           | 10     | 10     | -0.18    | 8        | 7      |
| 9           | 6      | 6      | 0.20     | 9        | 6      |
| 4           | 10     | 10     | -0.43    | 5        | 8      |
| 6           | 9      | 9      | -0.20    | 5        | 12     |
| 9           | 6      | 6      | 0.20     | 10       | 4      |
| <b>Mean</b> |        |        | 0.01     |          |        |
| <b>SEM</b>  |        |        | 0.14     |          |        |
| male        |        |        | 5 min    | female   |        |
| 0.5kV       | 0.5kV  | 0.5kV  |          | 0.5kV    | 0.5kV  |
| Uncharge    | Charge | Charge |          | Uncharge | Charge |
| 10          | 6      | 6      | 0.25     | 10       | 7      |
| 10          | 5      | 5      | 0.33     | 11       | 8      |
| 8           | 8      | 8      | 0.00     | 7        | 8      |
| 9           | 6      | 6      | 0.20     | 10       | 5      |

|      |        |       |        |       |
|------|--------|-------|--------|-------|
| 11   | 6      | 0.29  | 6      | 8     |
| 7    | 4      | 0.27  | 8      | 5     |
|      |        | 0.23  |        |       |
|      |        | 0.05  |        |       |
| male | 1kV    | 5 min | female | 1kV   |
| 7    | 1      | 0.75  | 11     | 4     |
| 7    | 2      | 0.56  | 10     | 4     |
| 7    | 2      | 0.56  | 9      | 1     |
| 8    | 1      | 0.78  | 12     | 4     |
| 9    | 3      | 0.50  | 10     | 4     |
| 10   | 4      | 0.43  | 9      | 3     |
|      |        | 0.59  |        |       |
|      |        | 0.06  |        |       |
| male | 1.5 kV | 5 min | female | 1.5kV |
| 7    | 1      | 0.75  | 10     | 2     |
| 9    | 1      | 0.80  | 14     | 4     |
| 6    | 2      | 0.50  | 13     | 4     |
| 10   | 4      | 0.43  | 9      | 2     |
| 8    | 3      | 0.45  | 13     | 4     |
| 10   | 3      | 0.54  | 14     | 4     |
|      |        | 0.58  |        |       |
|      |        | 0.06  |        |       |
| male | 2kV    | 5 min | female | 2kV   |
| 10   | 3      | 0.54  | 10     | 1     |
| 11   | 3      | 0.57  | 12     | 3     |
| 7    | 3      | 0.40  | 11     | 3     |
| 7    | 4      | 0.27  | 10     | 2     |
| 9    | 2      | 0.64  | 8      | 3     |
| 10   | 3      | 0.54  | 11     | 3     |
|      |        | 0.49  |        |       |
|      |        | 0.05  |        |       |

**Data for wing raising in intact live and dead flies**

0.5kV female Live 0.5kV 1kV 2kV 3kV 4kV 5kV

|        |       |       |       |       |      |       |
|--------|-------|-------|-------|-------|------|-------|
| -22.67 | -22.7 | -20.8 | -18.5 | 7.1   | 11.3 | 24.6  |
| -27.6  | -27.6 | -27.6 | -24.7 | 1.3   | 18.1 | 18.35 |
| -29.8  | -29.2 | -28.5 | -23.5 | -12.4 | 9.5  | 26.7  |
| -34.2  | -32.3 | -31.1 | -30.1 | -10.9 | 12.8 | 19.7  |
| -35.8  | -35.7 | -33.7 | -27.6 | -17.3 | 8.9  | 13.3  |
| -26.8  | -26.8 | -21.2 | -15.8 | -7.9  | 14.4 | 16.1  |
| -20.6  | -20.6 | -18.5 | -18.2 | -10.5 | 14.2 | 14.2  |
| -42    | -42   | -37.5 | -37.5 | -12.1 | 0.9  | 11.8  |

### Data for Amine levels in the brain

#### 4hr static EF group

##### Control (0kV/m)

| 5HT (C)   | DA (C)   | OA (C)   |
|-----------|----------|----------|
| 0.7919914 | 190.3584 | 23.93031 |
| 2.629817  | 232.8973 | 18.37624 |
| 1.294146  | 365.2107 | 30.16268 |
| 1.725628  | 279.519  | 65.23872 |
| 0.654905  | 139.8896 | 13.40591 |
| 0.9912207 | 162.8518 | 31.42636 |
| 0.6295068 | 156.8151 | 13.61334 |
| 0.7695954 | 120.2168 | 113.1426 |
| 1.499478  | 246.1277 | 46.06099 |
| 0.417167  | 91.25248 | 13.2421  |

##### Static Treatment (70kV/m)

| 5HT (S)   | DA (S)   | OA (S)   |
|-----------|----------|----------|
| 0.9109597 | 74.0043  | 602.0363 |
| 1.598099  | 67.12833 | 536.1805 |
| 0.9613234 | 49.80946 | 388.9438 |
| 0.5055968 | 49.58448 | 509.9812 |
| 0.8007491 | 47.58711 | 510.2641 |
| 1.696195  | 28.11425 | 325.1309 |
| 0.764128  | 53.66999 | 544.115  |
| 0.4304625 | 20.75035 | 242.2256 |
| 0.7661347 | 48.99151 | 552.0996 |

#### 24hr static EF group

##### Control (0kV/m)

| 5HT (C)   | DA (C)   | OA (C)   |
|-----------|----------|----------|
| 0.5522456 | 99.02903 | 30.29544 |
| 0.8614392 | 161.4054 | 37.99327 |
| 0.6667703 | 162.82   | 49.12798 |
| 0.9983554 | 130.7315 | 41.41559 |
| 0.7336383 | 134.185  | 43.25636 |
| 0.8250269 | 130.372  | 54.92112 |
| 0.7193372 | 166.2941 | 62.85099 |
| 1.054319  | 148.4115 | 96.90075 |
| 0.7584042 | 157.8604 | 64.72617 |
| 0.8438239 | 135.9572 |          |

##### Static treatment (70kV/m)

| 5HT (S)   | DA (S)   | OA (S)   |
|-----------|----------|----------|
| 0.2551081 | 74.94473 | 190.8234 |
| 0.1175575 | 72.05839 | 243.7636 |
| 0.1900142 | 65.34057 | 166.0696 |
| 0.1449384 | 70.21105 | 221.5057 |
| 0.1874093 | 59.72052 | 165.6538 |
| 0.0592918 | 45.53671 | 140.0349 |
| 0.2580115 | 50.05824 | 181.7974 |
| 0.1460871 | 67.39407 | 241.8133 |
| 0.1989989 | 71.08807 | 242.3628 |
|           | 89.49638 | 279.5774 |

#### 72hr static EF group

##### Control (0kV/m)

| 5HT (C)   | DA (C)   | OA (C)   |
|-----------|----------|----------|
| 0.6603087 | 337.275  | 14.8104  |
| 1.409617  | 267.1493 | 11.87827 |

##### Static Treatment (70kV/m)

| 5HT (S)   | DA (S)   | OA (S)   |
|-----------|----------|----------|
| 0.7661347 | 74.0043  | 602.0363 |
| 0.9109597 | 67.12833 | 536.1805 |

|           |          |          |           |          |          |
|-----------|----------|----------|-----------|----------|----------|
| 1.333189  | 386.676  | 23.49103 | 1.598099  | 49.80946 | 388.9438 |
| 1.40494   | 263.573  | 15.22146 | 0.9613234 | 49.58448 | 509.9812 |
| 0.5402099 | 367.4035 | 38.77203 | 0.5055968 | 47.58711 | 510.2641 |
| 0.4368935 | 340.0879 | 41.82849 | 0.8007491 | 28.11425 | 325.1309 |
| 1.536791  | 242.7993 | 34.62979 | 1.696195  | 53.66999 | 544.115  |
| 0.3943817 | 301.6231 | 48.03432 | 0.764128  | 20.75035 | 242.2256 |
| 0.4420714 | 197.6887 | 23.75521 | 0.4304625 | 48.99151 | 552.0996 |
| 0.7661359 | 230.7811 | 44.08208 |           |          |          |

All data given as pmol/head

(threshold voltage to raise wing in kV)

Female

1.3  
1.3  
1.1  
1.3  
0.5  
1.2  
0.9  
0.9

5 min

0.00  
0.20  
0.00  
0.07  
-0.27  
-0.57  
-0.10  
0.11

5 min

0.38  
0.07  
0.20  
-0.23  
-0.41  
0.43  
0.07  
0.14

5min

0.18  
0.16  
-0.07  
0.33

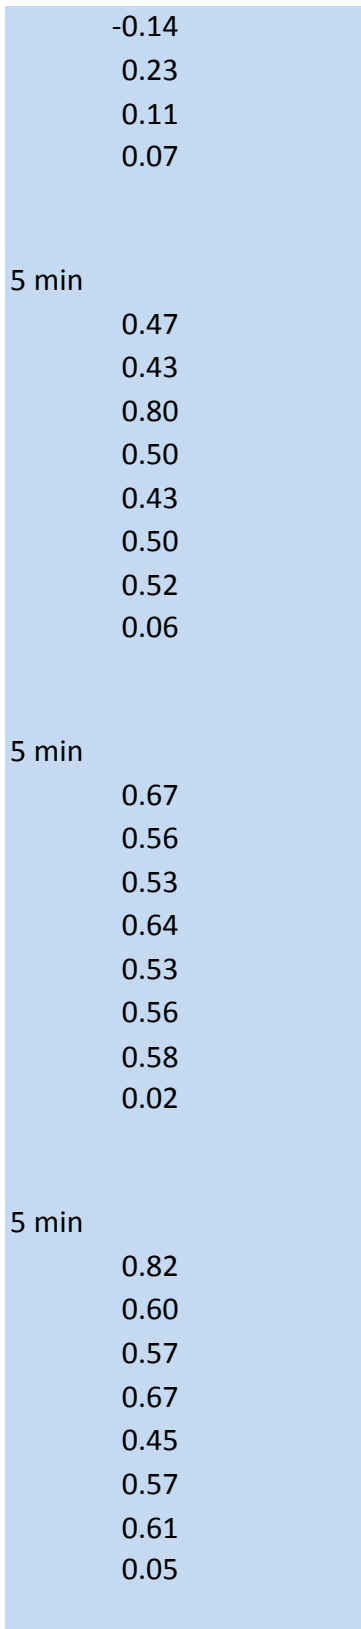

0kV female de    0.5kv    1kv    2kv    3kv    4kv

|       |       |       |       |       |      |
|-------|-------|-------|-------|-------|------|
| -19.9 | -17.8 | -16.8 | -16.6 | 18.5  | 25.9 |
| -28.9 | -28.9 | -26.7 | -20.6 | -18.6 | 20.6 |
| -36.8 | -36.8 | -35.7 | -30.6 | 9.2   | 23.4 |
| -24   | -23.9 | -20   | -16.6 | 13.9  | 29.4 |
| -30.2 | -29.1 | -29.1 | -27.7 | -23   | 5.2  |
| -28.4 | -28.2 | -26.9 | -24.4 | -12.4 | 16.2 |
| -30.3 | -24.8 | -24.8 | -22.9 | -10.9 | 21.9 |
| -36.5 | -35.5 | 32.9  | -26.5 | 20.6  | 18.6 |







**5kv**

**0kV live mal**

**0.5kv**

**1kv**

**2kv**

**3kv**

|      |       |       |       |       |       |
|------|-------|-------|-------|-------|-------|
| 38.9 | -27.5 | -26.1 | -26   | -24.2 | 5.3   |
| 28.9 | -28.2 | -25.4 | -18.6 | -18.4 | -12.5 |
| 24.3 | -26.9 | -24.6 | -23.2 | -15.9 | -6.6  |
| 28.8 | -23.9 | -23.7 | -17.2 | -15.3 | 2.7   |
| 19.6 | -31.9 | -31.9 | -29.1 | -28.5 | 0     |
| 38.8 | -24.9 | -22.2 | -22.9 | -20.1 | -15.3 |
| 22.6 | -24.1 | -24.1 | -23.3 | -7.2  | 8.8   |
| 18.6 | -23.8 | -32.8 | -22.8 | 1.2   | 6.9   |





4kv

5kv

0kv dead mal

0.5kv

1kv

2kv

|      |      |       |       |        |       |
|------|------|-------|-------|--------|-------|
| 15.1 | 23.8 | -33.2 | -31.4 | -28    | -23.2 |
| 13.1 | 51.1 | -23.4 | -22.1 | -22.1  | -15.4 |
| 50.7 | 50.7 | -30.8 | -29.1 | -28.3  | -5.8  |
| 17.2 | 17.1 | -26.5 | -26.5 | -20.5  | -18.1 |
| 16.8 | 38.4 | -31.6 | -31   | -27.3  | -27.5 |
| 9.6  | 26.1 | -27.1 | -25.8 | -25.85 | -25.3 |
| 21   | 33.5 | -30.1 | -30.1 | -23.5  | -19.5 |
| 14   | 22.6 | -20.3 | -19.5 | -16.2  | -13.5 |







**3kv**

**4kv**

**5kv**

|       |      |      |
|-------|------|------|
| -16.7 | 26.1 | 32.4 |
| 12.5  | 17.2 | 17.1 |
| 17.1  | 20.9 | 25.1 |
| -7.8  | 16.9 | 16.9 |
| -20.7 | 1.9  | 16.8 |
| -17.3 | 24.5 | 28.3 |
| 13.7  | 20   | 26.6 |
| 10.5  | 41.4 | 41.2 |
